# Supplementary material for: Understanding the Representative Gut Microbiota Dysbiosis in Metformin-Treated Type 2 Diabetes Patients Using Genome-Scale Metabolic Modeling
Source: Front Physiol. 2018 Jun 25;9:775. doi: 10.3389/fphys.2018.00775 (PMC6026676; doi:10.3389/fphys.2018.00775)
Supplement: TABLE S4 — Influence of oxygen exchange reaction on Synthetic Lethality Analysis of I. bartlettii. [file Data_Sheet_4.XLSX]

## Sheet: Sheet1
Original model								remove O2 from model								inhibit O2 on original model
Jsl		Jdl	Jdl		Essential exchange reactions			Jsl		Jdl	Jdl		Essential exchange reactions			Jsl		Jdl	Jdl	Essential exchange reactions
'ACGK'	1	'ALAR'	'DALAt2r'	1	'EX Biomass c0'			'ACGK'	1	'ADPT'	'ADSL1r'	1	'EX Biomass c0'			'ACGK'	1	'CO2t'	'H2CO3D'	'EX Biomass c0'
'ACOTA'	2	'ALAR'	'EX_ala_D_LPAREN_e_RPAREN_'	2	'Calcium exchange'			'ACOTA'	2	'ADPT'	'ADSS'	2	'Calcium exchange'			'ACOTA'	2	'CO2t'	'PC'	'Calcium exchange'
'ACPS1'	3	'CO2t'	'H2CO3D'	3	'exchange reaction for Chloride'			'ACPS1'	3	'CO2t'	'H2CO3D'	3	'exchange reaction for Chloride'			'ACPS1'	3	'CTPS2'	'CTPS1'	'exchange reaction for Chloride'
'AGPR'	4	'CO2t'	'PC'	4	'Co2+ exchange'			'AGPR'	4	'CO2t'	'PC'	4	'Co2+ exchange'			'AGPR'	4	'CYTK1'	'NTD4'	'Co2+ exchange'
'ALAALA'	5	'CYTK1'	'NTD4'	5	'Cu2+ exchange'			'ALAALA'	5	'CTPS1'	'CTPS2'	5	'Cu2+ exchange'			'ALAALA'	5	'DAPabc'	'APAT'	'Cu2+ exchange'
'BPNT'	6	'DAPabc'	'APAT'	6	'EX_fe2(u)'			'BPNT'	6	'CYTK1'	'NTD4'	6	'EX_fe2(u)'			'BPNT'	6	'DAPabc'	'ASAD'	'EX_fe2(u)'
'CA2abc'	7	'DAPabc'	'ASAD'	7	'Fe3+ exchange'			'CA2abc'	7	'DAPabc'	'APAT'	7	'Fe3+ exchange'			'CA2abc'	7	'DAPabc'	'ASPK'	'Fe3+ exchange'
'CDPMEK'	8	'DAPabc'	'ASPK'	8	'K+ exchange'			'CDPMEK'	8	'DAPabc'	'ASAD'	8	'K+ exchange'			'CDPMEK'	8	'DAPabc'	'DAPE'	'K+ exchange'
'Coabc'	9	'DAPabc'	'DAPE'	9	'Mg exchange'			'Coabc'	9	'DAPabc'	'ASPK'	9	'L-Methionine exchange'			'Coabc'	9	'DAPabc'	'DHDPRy'	'L-Methionine exchange'
'Cuabc'	10	'DAPabc'	'DHDPRy'	10	'Mn2+ exchange'			'Cuabc'	10	'DAPabc'	'DAPE'	10	'Mg exchange'			'Cuabc'	10	'DAPabc'	'DHDPS'	'Mg exchange'
'DMATT'	11	'DAPabc'	'DHDPS'	11	'Sulfate exchange'			'DMATT'	11	'DAPabc'	'DHDPRy'	11	'Mn2+ exchange'			'DMATT'	11	'DAPabc'	'ACEDIPIT'	'Mn2+ exchange'
'DPCOAK'	12	'DAPabc'	'ACEDIPIT'	12	'L-Tryptophan exchange'			'DPCOAK'	12	'DAPabc'	'DHDPS'	12	'Sulfate exchange'			'DPCOAK'	12	'DAPabc'	'DAPDAi'	'Sulfate exchange'
'DTMPK'	13	'DAPabc'	'DAPDAi'	13	'Zinc exchange'			'DTMPK'	13	'DAPabc'	'ACEDIPIT'	13	'L-Tryptophan exchange'			'DTMPK'	13	'DGSNt2'	'GMPS2'	'L-Tryptophan exchange'
'DXPRIr'	14	'DGSNt2'	'GMPS2'	14	'DNA replication c0'			'DXPRIr'	14	'DAPabc'	'DAPDAi'	14	'Zinc exchange'			'DXPRIr'	14	'DMPPS'	'DMPPS2r'	'Zinc exchange'
'DXPS'	15	'DMPPS'	'DMPPS2r'	15	'Protein biosynthesis c0'			'DXPS'	15	'DGSNt2'	'GMPS2'	15	'DNA replication c0'			'DXPS'	15	'ENO'	'PPDK'	'DNA replication c0'
'EX_biomass_LPAREN_e_RPAREN_'	16	'ENO'	'PPDK'	16	'RNA transcription c0'			'EX_biomass(e)'	16	'DMPPS'	'DMPPS2r'	16	'Protein biosynthesis c0'			'EX_biomass(e)'	16	'EX_26dap_M(e)'	'APAT'	'Protein biosynthesis c0'
'EX_ca2_LPAREN_e_RPAREN_'	17	'EX_26dap_M_LPAREN_e_RPAREN_'	'APAT'					'EX_ca2(e)'	17	'ENO'	'PPDK'	17	'RNA transcription c0'			'EX_ca2(e)'	17	'EX_26dap_M(e)'	'ASAD'	'RNA transcription c0'
'EX_cl_LPAREN_e_RPAREN_'	18	'EX_26dap_M_LPAREN_e_RPAREN_'	'ASAD'					'EX_cl(e)'	18	'EX_26dap_M(e)'	'APAT'					'EX_cl(e)'	18	'EX_26dap_M(e)'	'ASPK'
'EX_cobalt2_LPAREN_e_RPAREN_'	19	'EX_26dap_M_LPAREN_e_RPAREN_'	'ASPK'					'EX_cobalt2(e)'	19	'EX_26dap_M(e)'	'ASAD'					'EX_cobalt2(e)'	19	'EX_26dap_M(e)'	'DAPE'
'EX_cu2_LPAREN_e_RPAREN_'	20	'EX_26dap_M_LPAREN_e_RPAREN_'	'DAPE'					'EX_cu2(e)'	20	'EX_26dap_M(e)'	'ASPK'					'EX_cu2(e)'	20	'EX_26dap_M(e)'	'DHDPRy'
'EX_fe2_LPAREN_e_RPAREN_'	21	'EX_26dap_M_LPAREN_e_RPAREN_'	'DHDPRy'					'EX_fe2(e)'	21	'EX_26dap_M(e)'	'DAPE'					'EX_fe2(e)'	21	'EX_26dap_M(e)'	'DHDPS'
'EX_fe3_LPAREN_e_RPAREN_'	22	'EX_26dap_M_LPAREN_e_RPAREN_'	'DHDPS'					'EX_fe3(e)'	22	'EX_26dap_M(e)'	'DHDPRy'					'EX_fe3(e)'	22	'EX_26dap_M(e)'	'ACEDIPIT'
'EX_k_LPAREN_e_RPAREN_'	23	'EX_26dap_M_LPAREN_e_RPAREN_'	'ACEDIPIT'					'EX_k(e)'	23	'EX_26dap_M(e)'	'DHDPS'					'EX_k(e)'	23	'EX_26dap_M(e)'	'DAPDAi'
'EX_mg2_LPAREN_e_RPAREN_'	24	'EX_26dap_M_LPAREN_e_RPAREN_'	'DAPDAi'					'EX_met_L(e)'	24	'EX_26dap_M(e)'	'ACEDIPIT'					'EX_met_L(e)'	24	'EX_arg_L(e)'	'ARGSL'
'EX_mn2_LPAREN_e_RPAREN_'	25	'EX_arg_L_LPAREN_e_RPAREN_'	'ARGSL'					'EX_mg2(e)'	25	'EX_26dap_M(e)'	'DAPDAi'					'EX_mg2(e)'	25	'EX_arg_L(e)'	'ARGSSr'
'EX_pi_LPAREN_e_RPAREN_'	26	'EX_arg_L_LPAREN_e_RPAREN_'	'ARGSSr'					'EX_mn2(e)'	26	'EX_arg_L(e)'	'ARGSL'					'EX_mn2(e)'	26	'EX_arg_L(e)'	'CBPS'
'EX_pnto_R_LPAREN_e_RPAREN_'	27	'EX_arg_L_LPAREN_e_RPAREN_'	'CBPS'					'EX_pi(e)'	27	'EX_arg_L(e)'	'ARGSSr'					'EX_pi(e)'	27	'EX_arg_L(e)'	'H2CO3D'
'EX_so4_LPAREN_e_RPAREN_'	28	'EX_arg_L_LPAREN_e_RPAREN_'	'FUM'					'EX_pnto_R(e)'	28	'EX_arg_L(e)'	'CBPS'					'EX_pnto_R(e)'	28	'EX_arg_L(e)'	'OCBT'
'EX_thymd_LPAREN_e_RPAREN_'	29	'EX_arg_L_LPAREN_e_RPAREN_'	'H2CO3D'					'EX_so4(e)'	29	'EX_arg_L(e)'	'H2CO3D'					'EX_so4(e)'	29	'EX_co2(e)'	'H2CO3D'
'EX_trp_L_LPAREN_e_RPAREN_'	30	'EX_arg_L_LPAREN_e_RPAREN_'	'ME1'					'EX_thymd(e)'	30	'EX_arg_L(e)'	'OCBT'					'EX_thymd(e)'	30	'EX_co2(e)'	'PC'
'EX_zn2_LPAREN_e_RPAREN_'	31	'EX_arg_L_LPAREN_e_RPAREN_'	'OCBT'					'EX_trp_L(e)'	31	'EX_co2(e)'	'H2CO3D'					'EX_trp_L(e)'	31	'EX_dgsn(e)'	'GMPS2'
'FE2abc'	32	'EX_co2_LPAREN_e_RPAREN_'	'H2CO3D'					'EX_zn2(e)'	32	'EX_co2(e)'	'PC'					'EX_zn2(e)'	32	'EX_ile_L(e)'	'ACHBPL'
'FE3abc'	33	'EX_co2_LPAREN_e_RPAREN_'	'PC'					'FE2abc'	33	'EX_dgsn(e)'	'GMPS2'					'FE2abc'	33	'EX_ile_L(e)'	'DHAD2'
'FMNAT'	34	'EX_dgsn_LPAREN_e_RPAREN_'	'GMPS2'					'FE3abc'	34	'EX_ile_L(e)'	'ACHBPL'					'FE3abc'	34	'EX_ile_L(e)'	'ILETA'
'G1PACT'	35	'EX_ile_L_LPAREN_e_RPAREN_'	'ACHBPL'					'FMNAT'	35	'EX_ile_L(e)'	'DHAD2'					'FMNAT'	35	'EX_leu_L(e)'	'3MOBS'
'GALU'	36	'EX_ile_L_LPAREN_e_RPAREN_'	'DHAD2'					'G1PACT'	36	'EX_ile_L(e)'	'ILETA'					'G1PACT'	36	'EX_leu_L(e)'	'IPMDr'
'GF6PTA'	37	'EX_ile_L_LPAREN_e_RPAREN_'	'ILETA'					'GALU'	37	'EX_leu_L(e)'	'3MOBS'					'GALU'	37	'EX_leu_L(e)'	'IPPMIa'
'GLUR'	38	'EX_orn_LPAREN_e_RPAREN_'	'ARGSL'					'GF6PTA'	38	'EX_leu_L(e)'	'IPMDr'					'GF6PTA'	38	'EX_leu_L(e)'	'IPPMIb'
'GRTT'	39	'EX_orn_LPAREN_e_RPAREN_'	'ARGSSr'					'GLUR'	39	'EX_leu_L(e)'	'IPPMIa'					'GLUR'	39	'EX_leu_L(e)'	'OMCDC'
'Kt3r'	40	'EX_orn_LPAREN_e_RPAREN_'	'CBPS'					'GRTT'	40	'EX_leu_L(e)'	'IPPMIb'					'GRTT'	40	'EX_leu_L(e)'	'LEUTA'
'MECDPDH2'	41	'EX_orn_LPAREN_e_RPAREN_'	'FUM'					'Kt3r'	41	'EX_leu_L(e)'	'OMCDC'					'Kt3r'	41	'EX_orn(e)'	'ARGSL'
'MECDPS'	42	'EX_orn_LPAREN_e_RPAREN_'	'H2CO3D'					'MECDPDH2'	42	'EX_leu_L(e)'	'LEUTA'					'MECDPDH2'	42	'EX_orn(e)'	'ARGSSr'
'MEPCT'	43	'EX_orn_LPAREN_e_RPAREN_'	'ME1'					'MECDPS'	43	'EX_orn(e)'	'ARGSL'					'MECDPS'	43	'EX_orn(e)'	'CBPS'
'METATr'	44	'EX_orn_LPAREN_e_RPAREN_'	'OCBT'					'MEPCT'	44	'EX_orn(e)'	'ARGSSr'					'MEPCT'	44	'EX_orn(e)'	'H2CO3D'
'MNabc'	45	'EX_ribflv_LPAREN_e_RPAREN_'	'APRAUR'					'METATr'	45	'EX_orn(e)'	'CBPS'					'METATr'	45	'EX_orn(e)'	'OCBT'
'NNATr'	46	'EX_ribflv_LPAREN_e_RPAREN_'	'DB4PS'					'METabc'	46	'EX_orn(e)'	'H2CO3D'					'METabc'	46	'EX_pro_L(e)'	'G5SADs'
'ORNTAC'	47	'EX_ribflv_LPAREN_e_RPAREN_'	'DHPPDA'					'MNabc'	47	'EX_orn(e)'	'OCBT'					'MNabc'	47	'EX_pro_L(e)'	'G5SDr'
'PAPPT3'	48	'EX_ribflv_LPAREN_e_RPAREN_'	'GTPCII'					'NAPRT'	48	'EX_pro_L(e)'	'G5SADs'					'NAPRT'	48	'EX_pro_L(e)'	'GLU5K'
'PEPGLY'	49	'EX_ribflv_LPAREN_e_RPAREN_'	'RBFSa'					'NNATr'	49	'EX_pro_L(e)'	'G5SDr'					'NNATr'	49	'EX_pro_L(e)'	'P5CRyr'
'PGAMT'	50	'EX_ribflv_LPAREN_e_RPAREN_'	'RBFSb'					'ORNTAC'	50	'EX_pro_L(e)'	'GLU5K'					'ORNTAC'	50	'EX_ribflv(e)'	'APRAUR'
'PNTK'	51	'EX_ribflv_LPAREN_e_RPAREN_'	'PMDPHT'					'PAPPT3'	51	'EX_pro_L(e)'	'P5CRyr'					'PAPPT3'	51	'EX_ribflv(e)'	'DB4PS'
'PNTOt4'	52	'EX_val_L_LPAREN_e_RPAREN_'	'ACLS_b'					'PEPGLY'	52	'EX_ribflv(e)'	'APRAUR'					'PEPGLY'	52	'EX_ribflv(e)'	'DHPPDA'
'PPCDC'	53	'EX_val_L_LPAREN_e_RPAREN_'	'DHAD1'					'PGAMT'	53	'EX_ribflv(e)'	'DB4PS'					'PGAMT'	53	'EX_ribflv(e)'	'GTPCII'
'PRPPS'	54	'EX_val_L_LPAREN_e_RPAREN_'	'VALTA'					'PNTK'	54	'EX_ribflv(e)'	'DHPPDA'					'PNTK'	54	'EX_ribflv(e)'	'RBFSa'
'PTPAT'	55	'GK1'	'GK2'					'PNTOt4'	55	'EX_ribflv(e)'	'GTPCII'					'PNTOt4'	55	'EX_ribflv(e)'	'RBFSb'
'RBFK'	56	'GUAPRT'	'GMPS2'					'PPCDC'	56	'EX_ribflv(e)'	'RBFSa'					'PPCDC'	56	'EX_ribflv(e)'	'PMDPHT'
'SO4t2'	57	'ILEt2r'	'ACHBPL'					'PRPPS'	57	'EX_ribflv(e)'	'RBFSb'					'PRPPS'	57	'EX_val_L(e)'	'ACLS_b'
'TECA4S'	58	'ILEt2r'	'DHAD2'					'PTPAT'	58	'EX_ribflv(e)'	'PMDPHT'					'PTPAT'	58	'EX_val_L(e)'	'DHAD1'
'THMDt2r'	59	'ILEt2r'	'ILETA'					'RBFK'	59	'EX_val_L(e)'	'ACLS_b'					'RBFK'	59	'EX_val_L(e)'	'VALTA'
'TMDK1'	60	'IPDPS'	'IPDPS2'					'SO4t2'	60	'EX_val_L(e)'	'DHAD1'					'SO4t2'	60	'GK1'	'GK2'
'TRDRr'	61	'MGt5'	'MG2abc'					'TECA4S'	61	'EX_val_L(e)'	'VALTA'					'TECA4S'	61	'GUAPRT'	'GMPS2'
'TRPt2r'	62	'NADK2'	'NADK'					'THMDt2r'	62	'GK1'	'GK2'					'THMDt2r'	62	'ILEt2r'	'ACHBPL'
'UAAGDS'	63	'NADS1'	'NADS2'					'TMDK1'	63	'GUAPRT'	'GMPS2'					'TMDK1'	63	'ILEt2r'	'DHAD2'
'UAG4E'	64	'NAPRT'	'ASPO6'					'TRDRr'	64	'ILEt2r'	'ACHBPL'					'TRDRr'	64	'ILEt2r'	'ILETA'
'UAGCVT_r'	65	'NAPRT'	'EX_o2_LPAREN_e_RPAREN_'					'TRPt2r'	65	'ILEt2r'	'DHAD2'					'TRPt2r'	65	'IPDPS2'	'IPDPS'
'UAGDP'	66	'NAPRT'	'NNDPR'					'UAAGDS'	66	'ILEt2r'	'ILETA'					'UAAGDS'	66	'LEUt2r'	'3MOBS'
'UAGPT3'	67	'NAPRT'	'O2t'					'UAG4E'	67	'IPDPS2'	'IPDPS'					'UAG4E'	67	'LEUt2r'	'IPMDr'
'UAMAGS'	68	'NAPRT'	'QULNS'					'UAGCVT_r'	68	'LEUt2r'	'3MOBS'					'UAGCVT_r'	68	'LEUt2r'	'IPPMIa'
'UAMAS'	69	'NAPRT'	'THIORDXi'					'UAGDP'	69	'LEUt2r'	'IPMDr'					'UAGDP'	69	'LEUt2r'	'IPPMIb'
'UAPGR'	70	'PGM'	'PPDK'					'UAGPT3'	70	'LEUt2r'	'IPPMIa'					'UAGPT3'	70	'LEUt2r'	'OMCDC'
'UDCPDP'	71	'PIt7'	'PIabc'					'UAMAGS'	71	'LEUt2r'	'IPPMIb'					'UAMAGS'	71	'LEUt2r'	'LEUTA'
'UDCPDPS'	72	'POR4'	'PPA'					'UAMAS'	72	'LEUt2r'	'OMCDC'					'UAMAS'	72	'MGt5'	'MG2abc'
'UGMDDS'	73	'PPNCL3'	'r0671'					'UAPGR'	73	'LEUt2r'	'LEUTA'					'UAPGR'	73	'NADK'	'NADK2'
'UMPK'	74	'PUNP4'	'GMPS2'					'UDCPDP'	74	'MGt5'	'MG2abc'					'UDCPDP'	74	'NADS1'	'NADS2'
'ZNabc'	75	'PYDXKr'	'PLPS'					'UDCPDPS'	75	'NADK'	'NADK2'					'UDCPDPS'	75	'PGM'	'PPDK'
'dreplication'	76	'RIBFLVt2r'	'APRAUR'					'UGMDDS'	76	'NADS1'	'NADS2'					'UGMDDS'	76	'PIt7'	'PIabc'
'pbiosynthesis'	77	'RIBFLVt2r'	'DB4PS'					'UMPK'	77	'PGM'	'PPDK'					'UMPK'	77	'POR4'	'PPA'
'r2137'	78	'RIBFLVt2r'	'DHPPDA'					'ZNabc'	78	'PIt7'	'PIabc'					'ZNabc'	78	'PPNCL3'	'r0671'
'rtranscription'	79	'RIBFLVt2r'	'GTPCII'					'dreplication'	79	'POR4'	'PPA'					'dreplication'	79	'PUNP4'	'GMPS2'
'biomass472'	80	'RIBFLVt2r'	'RBFSa'					'pbiosynthesis'	80	'PPNCL3'	'r0671'					'pbiosynthesis'	80	'PYDXKr'	'PLPS'
	81	'RIBFLVt2r'	'RBFSb'					'r2137'	81	'PUNP4'	'GMPS2'					'r2137'	81	'RIBFLVt2r'	'APRAUR'
	82	'RIBFLVt2r'	'PMDPHT'					'rtranscription'	82	'PYDXKr'	'PLPS'					'rtranscription'	82	'RIBFLVt2r'	'DB4PS'
	83	'RNTR1'	'RNDR1'					'EX_nac(e)'	83	'RIBFLVt2r'	'APRAUR'					'EX_nac(e)'	83	'RIBFLVt2r'	'DHPPDA'
	84	'RNTR2'	'RNDR2'					'NACt2r'	84	'RIBFLVt2r'	'DB4PS'					'NACt2r'	84	'RIBFLVt2r'	'GTPCII'
	85	'VALt2r'	'ACLS_b'					'biomass472'	85	'RIBFLVt2r'	'DHPPDA'					'biomass472'	85	'RIBFLVt2r'	'RBFSa'
	86	'VALt2r'	'DHAD1'						86	'RIBFLVt2r'	'GTPCII'						86	'RIBFLVt2r'	'RBFSb'
	87	'VALt2r'	'VALTA'						87	'RIBFLVt2r'	'RBFSa'						87	'RIBFLVt2r'	'PMDPHT'
	88	'r1667'	'ARGSL'						88	'RIBFLVt2r'	'RBFSb'						88	'RNDR2'	'RNTR2'
	89	'r1667'	'ARGSSr'						89	'RIBFLVt2r'	'PMDPHT'						89	'RNTR1'	'RNDR1'
	90	'r1667'	'CBPS'						90	'RNDR2'	'RNTR2'						90	'VALt2r'	'ACLS_b'
	91	'r1667'	'FUM'						91	'RNTR1'	'RNDR1'						91	'VALt2r'	'DHAD1'
	92	'r1667'	'H2CO3D'						92	'VALt2r'	'ACLS_b'						92	'VALt2r'	'VALTA'
	93	'r1667'	'ME1'						93	'VALt2r'	'DHAD1'						93	'r1667'	'ARGSL'
	94	'r1667'	'OCBT'						94	'VALt2r'	'VALTA'						94	'r1667'	'ARGSSr'
	95	'EX_pydx_LPAREN_e_RPAREN_'	'PLPS'						95	'r1667'	'ARGSL'						95	'r1667'	'CBPS'
	96	'PYDXtr'	'PLPS'						96	'r1667'	'ARGSSr'						96	'r1667'	'H2CO3D'
	97	'PGMT'	'AMALT4'						97	'r1667'	'CBPS'						97	'r1667'	'OCBT'
	98	'PGMT'	'EX_malt_LPAREN_e_RPAREN_'						98	'r1667'	'H2CO3D'						98	'EX_pydx(e)'	'PLPS'
	99	'PGMT'	'MALTabc'						99	'r1667'	'OCBT'						99	'PYDXtr'	'PLPS'
	100	'PGMT'	'MLTP3'						100	'EX_pydx(e)'	'PLPS'						100	'EX_his_L(e)'	'IG3PS'
	101	'PGMT'	'HEX1'						101	'PYDXtr'	'PLPS'						101	'EX_his_L(e)'	'IGPDH'
	102	'EX_lys_L_LPAREN_e_RPAREN_'	'DAPDC'						102	'EX_his_L(e)'	'AICART'						102	'EX_his_L(e)'	'PRAMPC'
	103	'LYSt2r'	'DAPDC'						103	'EX_his_L(e)'	'HISTP'						103	'EX_his_L(e)'	'PRATPP'
	104	'EX_nac_LPAREN_e_RPAREN_'	'ASPO6'						104	'EX_his_L(e)'	'HSTPTr'						104	'EX_his_L(e)'	'PRMICI'
	105	'EX_nac_LPAREN_e_RPAREN_'	'EX_o2_LPAREN_e_RPAREN_'						105	'EX_his_L(e)'	'IG3PS'						105	'HISt2r'	'IG3PS'
	106	'EX_nac_LPAREN_e_RPAREN_'	'NNDPR'						106	'EX_his_L(e)'	'IGPDH'						106	'HISt2r'	'IGPDH'
	107	'EX_nac_LPAREN_e_RPAREN_'	'O2t'						107	'EX_his_L(e)'	'IMPC'						107	'HISt2r'	'PRAMPC'
	108	'EX_nac_LPAREN_e_RPAREN_'	'QULNS'						108	'EX_his_L(e)'	'PRAMPC'						108	'HISt2r'	'PRATPP'
	109	'EX_nac_LPAREN_e_RPAREN_'	'THIORDXi'						109	'EX_his_L(e)'	'PRATPP'						109	'HISt2r'	'PRMICI'
	110	'NACt2r'	'ASPO6'						110	'EX_his_L(e)'	'PRMICI'						110	'EX_asn_L(e)'	'ASNS2'
	111	'NACt2r'	'EX_o2_LPAREN_e_RPAREN_'						111	'HISt2r'	'AICART'						111	'ASNt2r'	'ASNS2'
	112	'NACt2r'	'NNDPR'						112	'HISt2r'	'HISTP'						112	'EX_tyr_L(e)'	'CHORS'
	113	'NACt2r'	'O2t'						113	'HISt2r'	'HSTPTr'						113	'EX_tyr_L(e)'	'DDPA'
	114	'NACt2r'	'QULNS'						114	'HISt2r'	'IG3PS'						114	'EX_tyr_L(e)'	'DHQS'
	115	'NACt2r'	'THIORDXi'						115	'HISt2r'	'IGPDH'						115	'EX_tyr_L(e)'	'DHQTi'
	116	'PACCOALr'	'PPA'						116	'HISt2r'	'IMPC'						116	'EX_tyr_L(e)'	'PSCVT'
	117	'IOR2'	'PPA'						117	'HISt2r'	'PRAMPC'						117	'EX_tyr_L(e)'	'SHK3Dr'
	118	'EX_pac_LPAREN_e_RPAREN_'	'PPA'						118	'HISt2r'	'PRATPP'						118	'EX_tyr_L(e)'	'SHKK'
	119	'PACt2r'	'PPA'						119	'HISt2r'	'PRMICI'						119	'EX_tyr_L(e)'	'CHORM'
	120	'ADK10'	'NDPK4'						120	'EX_asn_L(e)'	'ASNS2'						120	'TYRt2r'	'CHORS'
	121	'ADK3'	'NDPK1'						121	'ASNt2r'	'ASNS2'						121	'TYRt2r'	'DDPA'
	122	'UTPATPT'	'NDPK2'						122	'EX_tyr_L(e)'	'CHORS'						122	'TYRt2r'	'DHQS'
	123	'ADSL1r'	'ADPT'						123	'EX_tyr_L(e)'	'DDPA'						123	'TYRt2r'	'DHQTi'
	124	'ADSS'	'ADPT'						124	'EX_tyr_L(e)'	'DHQS'						124	'TYRt2r'	'PSCVT'
									125	'EX_tyr_L(e)'	'DHQTi'						125	'TYRt2r'	'SHK3Dr'
									126	'EX_tyr_L(e)'	'PSCVT'						126	'TYRt2r'	'SHKK'
									127	'EX_tyr_L(e)'	'SHK3Dr'						127	'TYRt2r'	'CHORM'
									128	'EX_tyr_L(e)'	'SHKK'						128	'EX_lys_L(e)'	'DAPDC'
									129	'EX_tyr_L(e)'	'CHORM'						129	'LYSt2r'	'DAPDC'
									130	'TYRt2r'	'CHORS'						130	'PACCOALr'	'PPA'
									131	'TYRt2r'	'DDPA'						131	'IOR2'	'PPA'
									132	'TYRt2r'	'DHQS'						132	'EX_pac(e)'	'PPA'
									133	'TYRt2r'	'DHQTi'						133	'PACt2r'	'PPA'
									134	'TYRt2r'	'PSCVT'						134	'ADK10'	'NDPK4'
									135	'TYRt2r'	'SHK3Dr'						135	'ADK3'	'NDPK1'
									136	'TYRt2r'	'SHKK'						136	'UTPATPT'	'NDPK2'
									137	'TYRt2r'	'CHORM'						137	'ADSL1r'	'ADPT'
									138	'EX_lys_L(e)'	'DAPDC'						138	'ADSS'	'ADPT'
									139	'LYSt2r'	'DAPDC'						139	'DALAt2r'	'ALAR'
									140	'PACCOALr'	'PPA'						140	'EX_ala_D(e)'	'ALAR'
									141	'IOR2'	'PPA'						141	'FUM'	'ADPT'
									142	'EX_pac(e)'	'PPA'						142	'FUM'	'EX_arg_L(e)'
									143	'PACt2r'	'PPA'						143	'FUM'	'EX_orn(e)'
									144	'ADK10'	'NDPK4'						144	'ME1'	'ADPT'
									145	'ADK3'	'NDPK1'						145	'ME1'	'EX_arg_L(e)'
									146	'UTPATPT'	'NDPK2'						146	'ME1'	'EX_orn(e)'
									147	'DALAt2r'	'ALAR'						147	'r1667'	'FUM'
									148	'EX_ala_D(e)'	'ALAR'						148	'r1667'	'ME1'
									149	'FUM'	'ADPT'						149	'PGMT'	'AMALT4'
									150	'FUM'	'EX_arg_L(e)'						150	'PGMT'	'EX_malt(e)'
									151	'FUM'	'EX_orn(e)'						151	'PGMT'	'MALTabc'
									152	'ME1'	'ADPT'						152	'PGMT'	'MLTP3'
									153	'ME1'	'EX_arg_L(e)'						153	'EX_cys_L(e)'	'AMPTASECG'
									154	'ME1'	'EX_orn(e)'						154	'EX_cys_L(e)'	'CGLYabc'
									155	'r1667'	'FUM'						155	'EX_cys_L(e)'	'EX_cgly(e)'
									156	'r1667'	'ME1'						156	'CYSt2r'	'AMPTASECG'
									157	'PGMT'	'AMALT4'						157	'CYSt2r'	'CGLYabc'
									158	'PGMT'	'EX_malt(e)'						158	'CYSt2r'	'EX_cgly(e)'
									159	'PGMT'	'MALTabc'						159	'EX_his_L(e)'	'AICART'
									160	'PGMT'	'MLTP3'						160	'EX_his_L(e)'	'HISTP'
									161	'EX_cys_L(e)'	'AMPTASECG'						161	'EX_his_L(e)'	'HSTPTr'
									162	'EX_cys_L(e)'	'CGLYabc'						162	'EX_his_L(e)'	'IMPC'
									163	'EX_cys_L(e)'	'EX_cgly(e)'						163	'HISt2r'	'AICART'
									164	'CYSt2r'	'AMPTASECG'						164	'HISt2r'	'HISTP'
									165	'CYSt2r'	'CGLYabc'						165	'HISt2r'	'HSTPTr'
									166	'CYSt2r'	'EX_cgly(e)'						166	'HISt2r'	'IMPC'
									167	'EX_phe_L(e)'	'PHETA1'						167	'EX_phe_L(e)'	'PHETA1'
									168	'EX_phe_L(e)'	'PPNDH'						168	'EX_phe_L(e)'	'PPNDH'
									169	'PHEt2r'	'PHETA1'						169	'PHEt2r'	'PHETA1'
									170	'PHEt2r'	'PPNDH'						170	'PHEt2r'	'PPNDH'
									171	'HEX1'	'PGMT'						171	'HEX1'	'PGMT'
